# Supplementary material for: Epigallocatechin-3-gallate preferentially induces aggregation of amyloidogenic immunoglobulin light chains
Source: Sci Rep. 2017 Jan 27;7:41515. doi: 10.1038/srep41515 (PMC5269747; doi:10.1038/srep41515)
Supplement: Supporting Information [file srep41515-s1.pdf]

1 Supporting Information for the manuscript

2

3

4 **Epigallocatechin-3-gallate preferentially induces aggregation of amyloidogenic**

5 **immunoglobulin light chains**

6

7

8 Manuel Hora<sup>1,2</sup>, Martin Carballo Pacheco<sup>3</sup>, Benedikt Weber<sup>1</sup>, Vanessa K. Morris<sup>1</sup>, Antje Wittkopf<sup>1</sup>,

9 Johannes Buchner<sup>1</sup>, Birgit Strodel<sup>3</sup>, Bernd Reif<sup>1,2\*</sup>

10

11 **Affiliations**

12

13 1: Center for Integrated Protein Science at Department Chemie, Technische Universität München

14 Lichtenbergstrasse 4, 85747 Garching, Germany

15

16 2: Helmholtz-Zentrum München (HMGU), Ingolstädter Landstr. 1, 85764 Neuherberg, Germany

17

18 3: Institute of Complex Systems: Structural Biochemistry at Forschungszentrum Jülich, 52425

19 Jülich, Germany

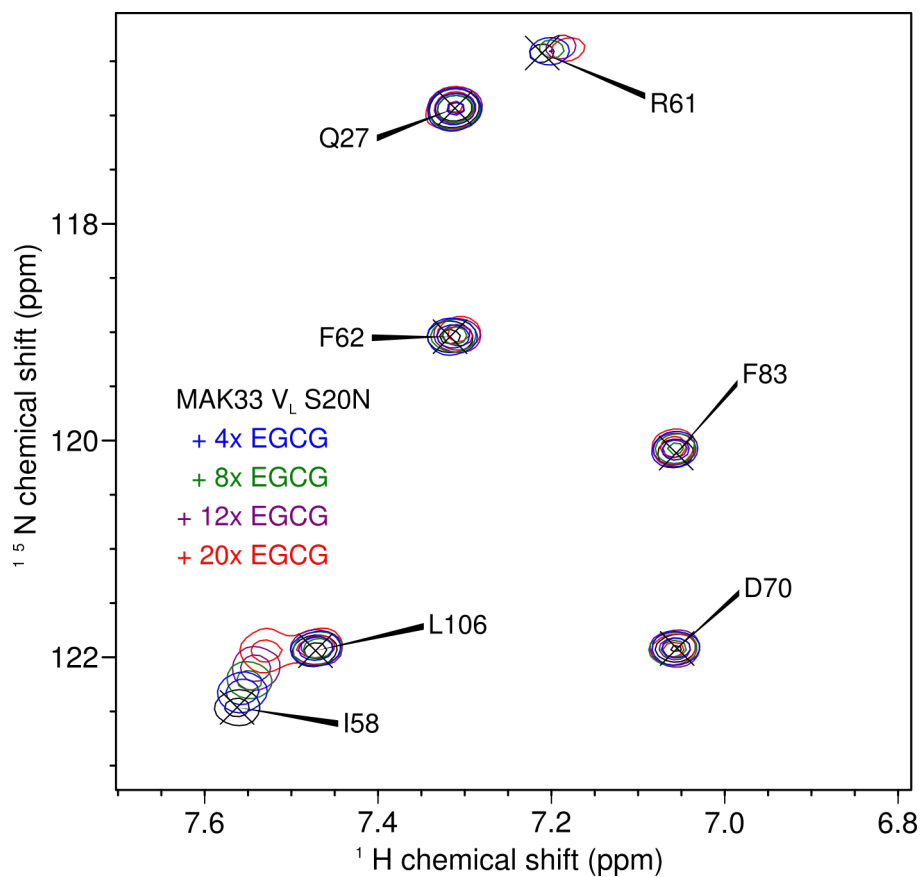

21

22 SI 1: Chemical shift changes at varying EGCG concentrations. EGCG was added stepwise to  
23 50  $\mu$ M MAK33 V<sub>L</sub> S20N. A region of the <sup>1</sup>H, <sup>15</sup>N NMR correlation spectra is shown.

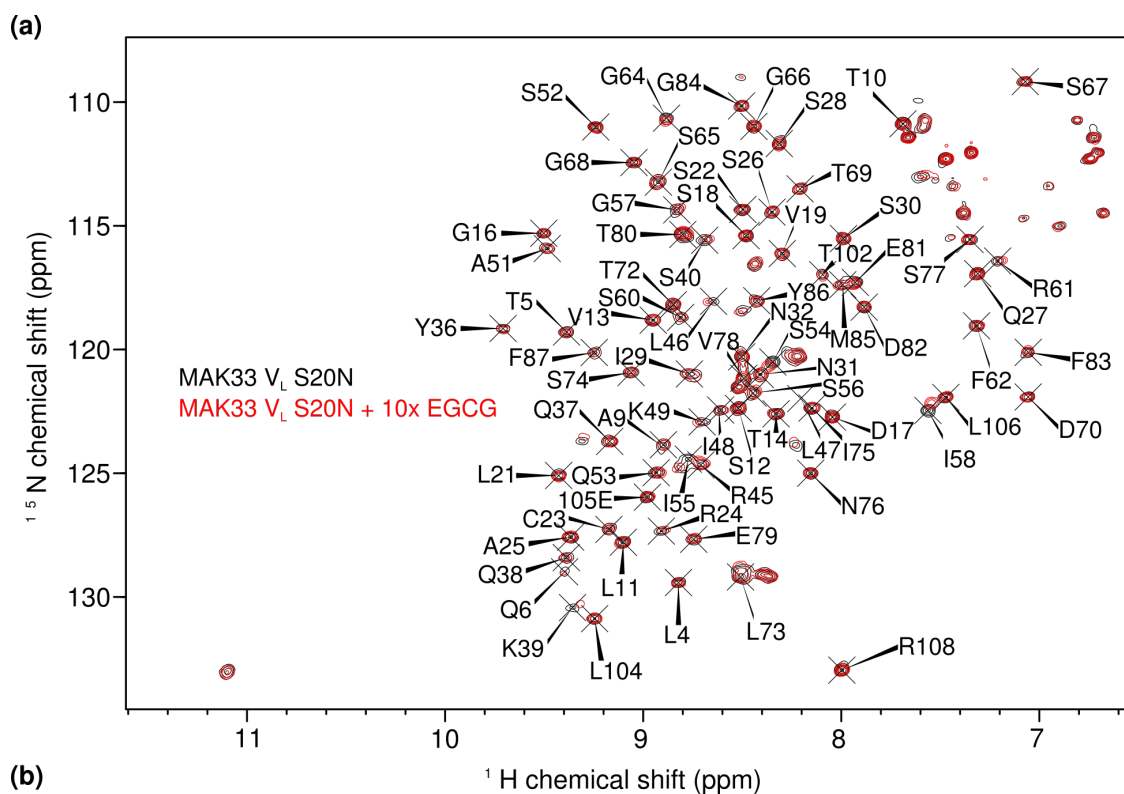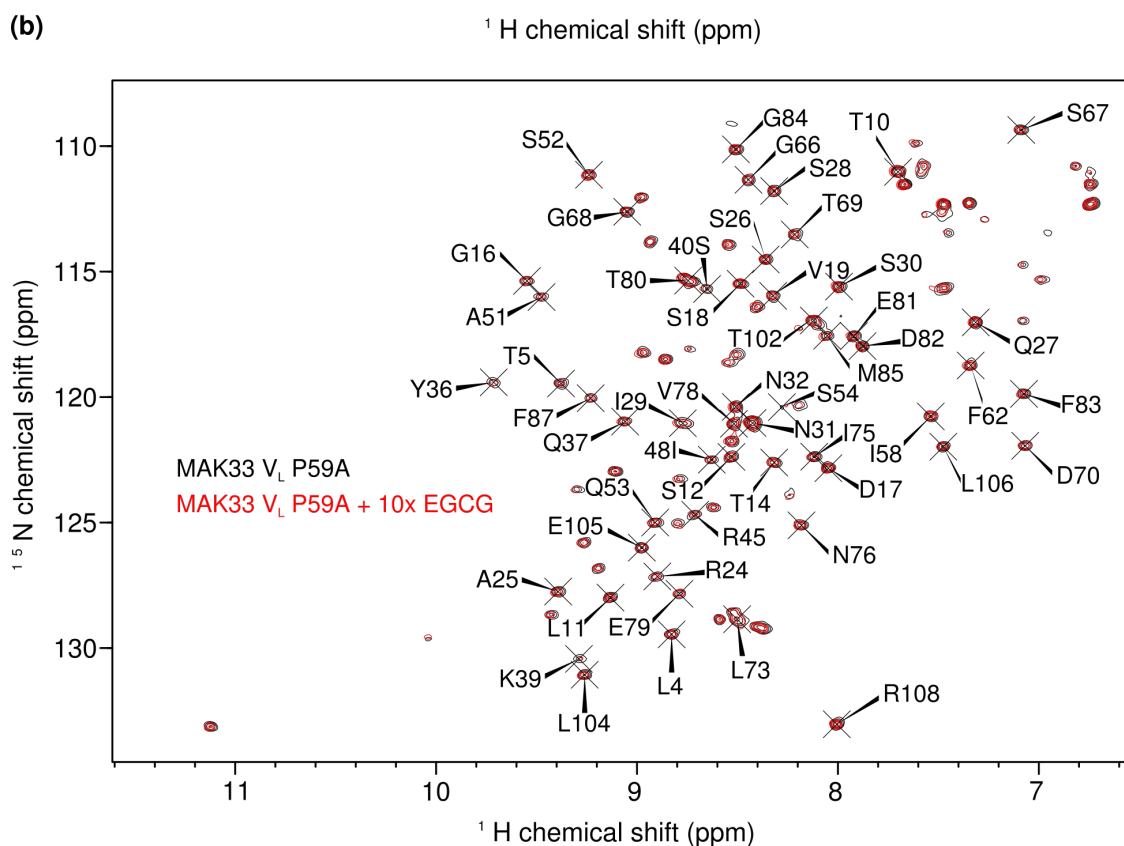

24

25 SI 2:  $^1\text{H}$ ,  $^{15}\text{N}$  NMR correlation spectra of MAK33 V<sub>L</sub> S20N and V<sub>L</sub> P59A in presence and absence  
 26 of 10x molar excess of EGCG. The spectra shown here are the full HSQC experiments, of which a  
 27 part is displayed in the main publication, Fig. 1b) and c).

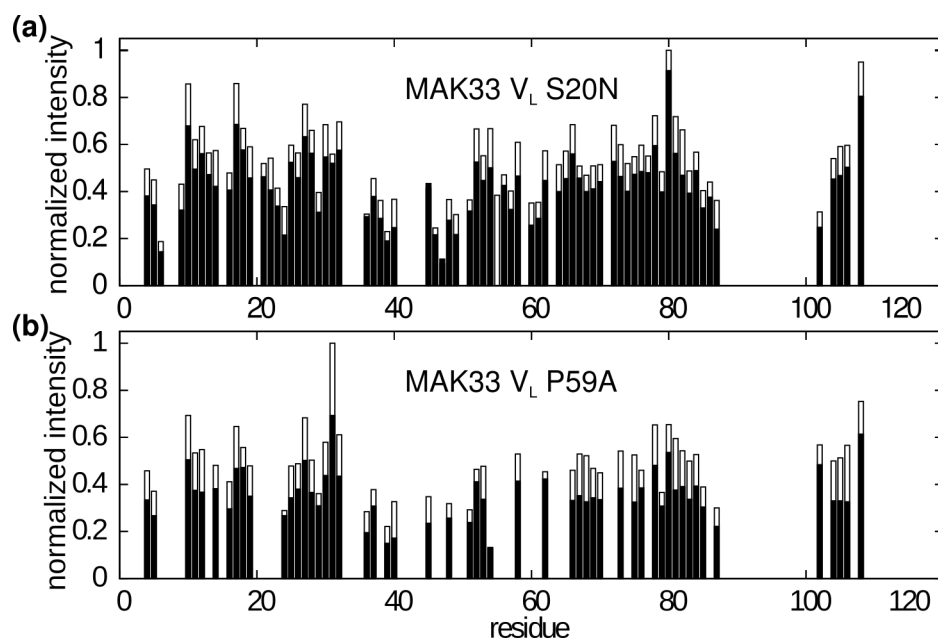

28

29 SI 3: Relative NMR signal intensities of MAK33 V<sub>L</sub> S20N (a) and V<sub>L</sub> P59A (b) in absence (white)

30 and presence of 10x molar excess of EGCG (black).

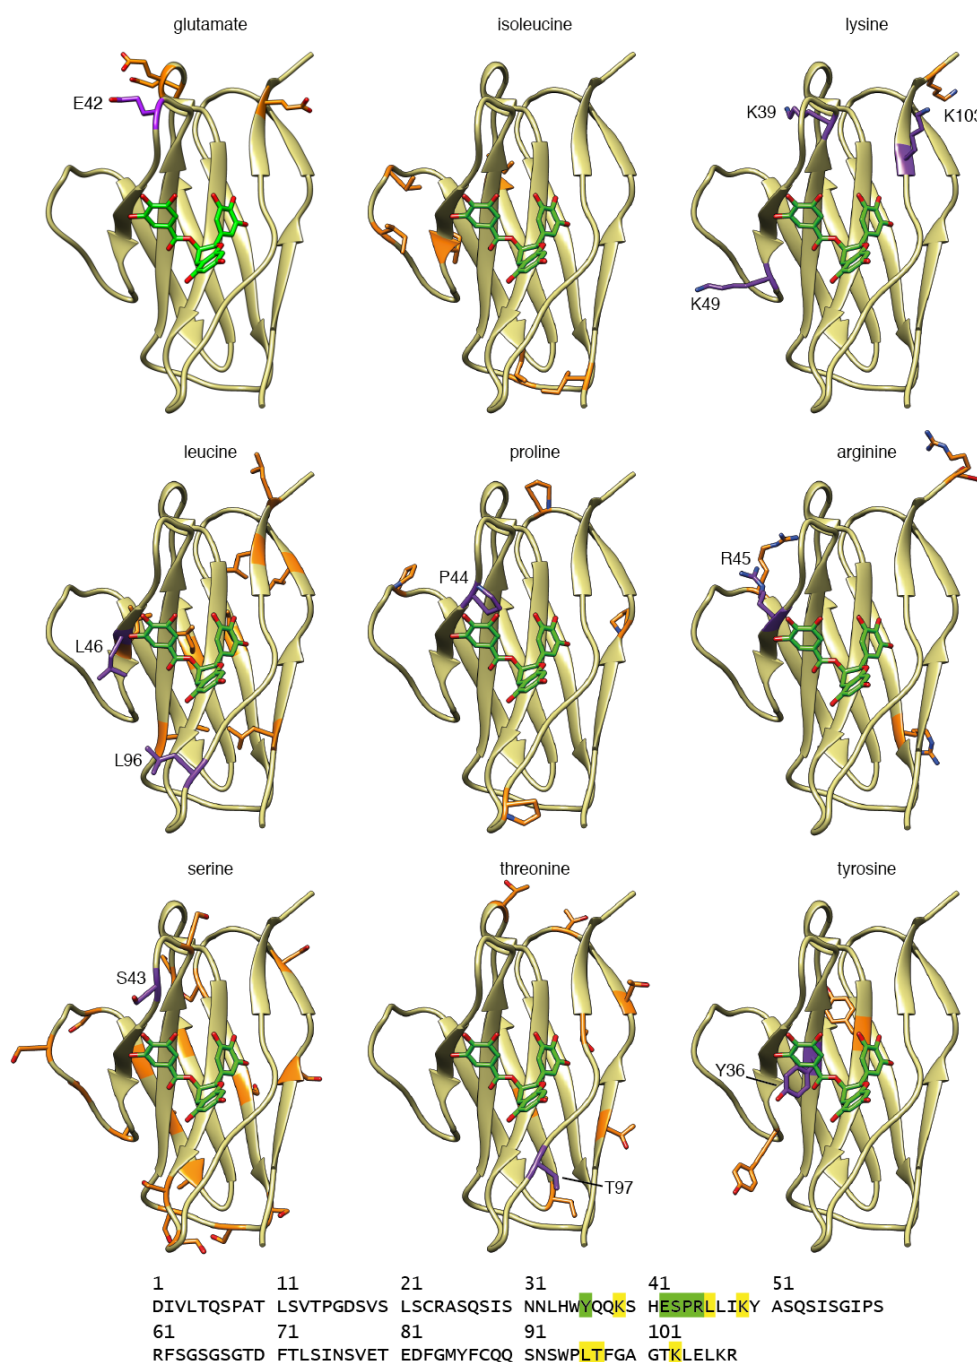

31

32 SI 4: Residues identified by MAS solid-state NMR spectroscopy were assigned based on structural  
 33 proximity to EGCG. The most stable binding pose of EGCG from the docking experiments was  
 34 used for analysis. For each amino acid type, all residues are highlighted in orange. The closest  
 35 residue to EGCG is highlighted in purple. In case of isoleucine, no close residue could be identified.  
 36 For lysine und leucine, several conceivable residues were found. These ambiguous assignments are  
 37 highlighted in yellow in the primary sequences. Unambiguous assignments are shown in green.

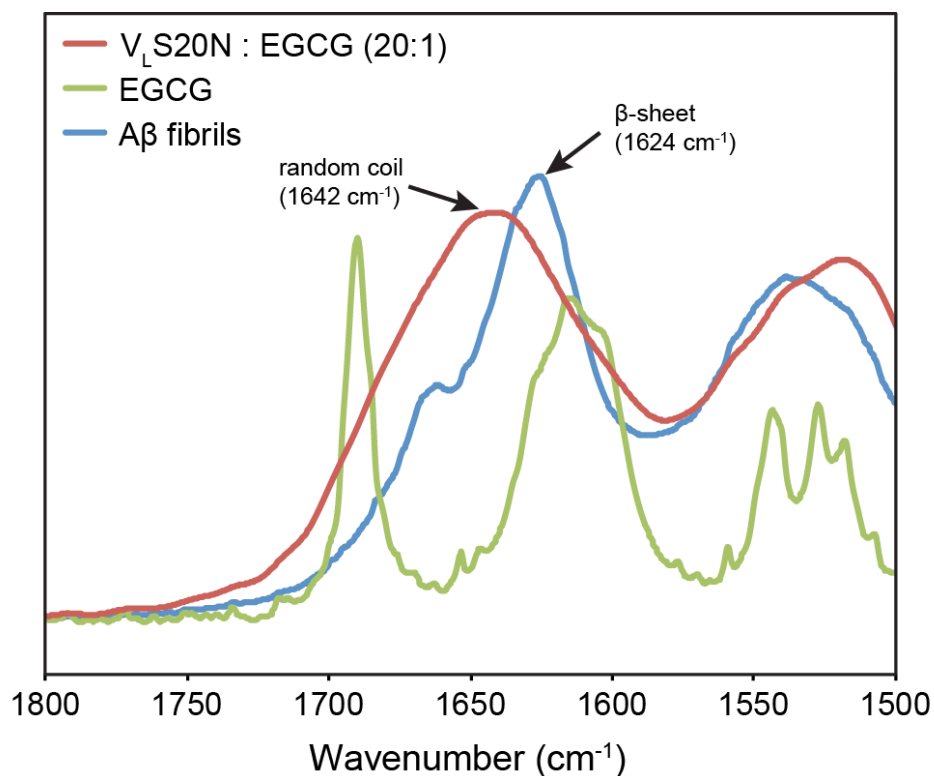

39

40 SI 5: Fourier-transform infrared spectroscopic (FTIR) analysis of EGCG-protein coprecipitates (20-  
41 fold molar excess of EGCG). Precipitates of MAK33 V<sub>L</sub> S20N with EGCG (red) show an FTIR  
42 peak at 1642 cm<sup>-1</sup>. Interpretation of the amide I peak is difficult due to overlap with EGCG signals  
43 (green). The peak at 1642 cm<sup>-1</sup> indicates disordered or helical structure <sup>1,2</sup>. In comparison, amyloid-  
44 beta fibrils (blue) display a characteristic peak at 1624 cm<sup>-1</sup>.

## 45    **Material and methods**

46

### 47    Fourier-transform infrared spectroscopy

48    EGCG was added to a solution of 50  $\mu$ M MAK33 V<sub>L</sub> S20N to a final concentration of 1 mM and  
49    incubated with shaking at room temperature for 4 days. The aggregates were isolated by  
50    centrifugation and washed once with water, and then lyophilised to remove residual water.  
51    Amyloid-beta fibrils were prepared from peptide recombinantly expressed and purified as  
52    previously reported<sup>3</sup>. Lyophilised peptide was dissolved in 10 mM NaOH and centrifuged to  
53    remove preformed aggregates, before dissolution in buffer to a final concentration of 50  $\mu$ M  
54    amyloid-beta, 50 mM phosphate, pH 7.4. This solution was shaken at room temperature for one  
55    week. Fibrils were isolated by centrifugation and washed once with water. Spectra were recorded on  
56    a JASCO FT/IR-4100 FT-IR spectrometer with attenuated total reflectance (ATR) attachment. The  
57    samples were measured with 128 scans at a resolution of 2 cm<sup>-1</sup> at room temperature.

58

59

60

## 61    **References**

- 62    1.    Byler, D. M. & Susi, H. Examination of the secondary structure of proteins by deconvolved  
63        FTIR spectra. *Biopolymers* **25**, 469–487 (1986).
- 64    2.    Fowler, D. M. *et al.* Functional amyloid formation within mammalian tissue. *PLoS Biol.* **4**,  
65        0100–0107 (2006).
- 66    3.    Dasari, M. *et al.* Bacterial inclusion bodies of Alzheimer's disease  $\beta$ -amyloid peptides can  
67        be employed to study native-like aggregation intermediate states. *Chembiochem* **12**, 407–  
68        423 (2011).

69
